# Supplementary material
Source: Springer Nature journal article supplement (https://www.springermedizin.de/resource/supplementary/12865_2008_168_MOESM4_ESM.pdf/9428654)

**A.**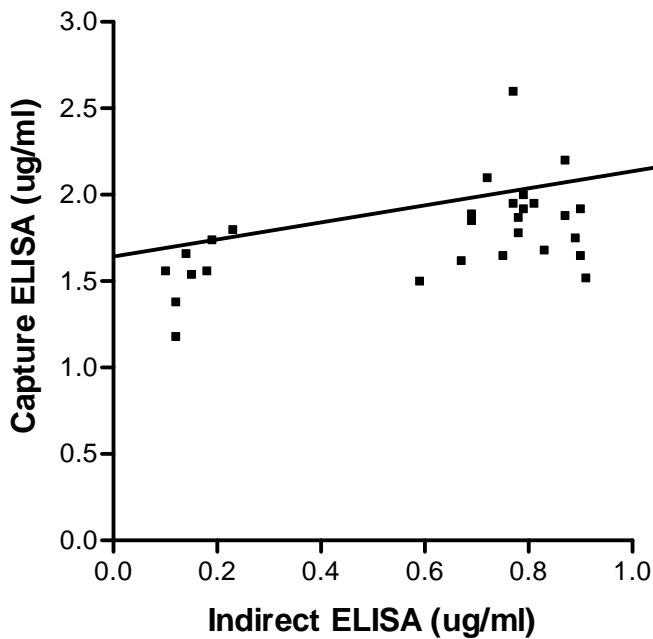**B.**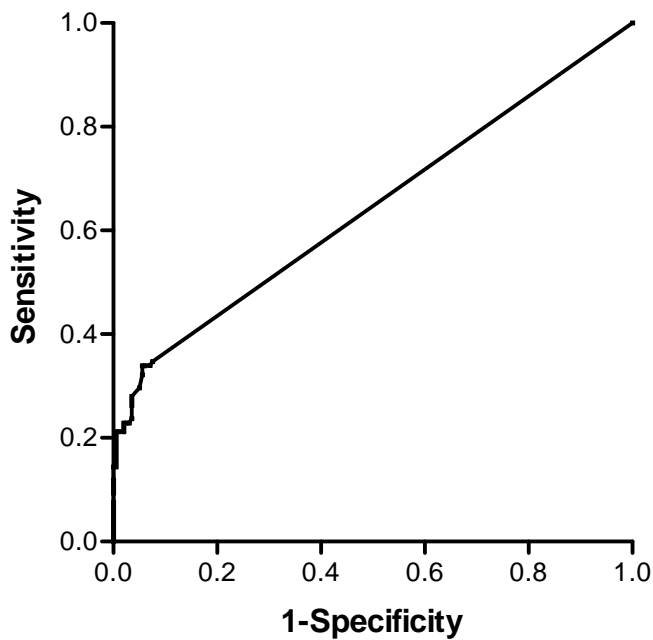

Supplement: MOESM4 [file 9428654]
